# Supplementary material
Source: PubMed Central journal article supplement (PMC283576)
Supplement: pnas_100_24_14241__6.pdf [file pnas_100_24_14241__6.pdf]

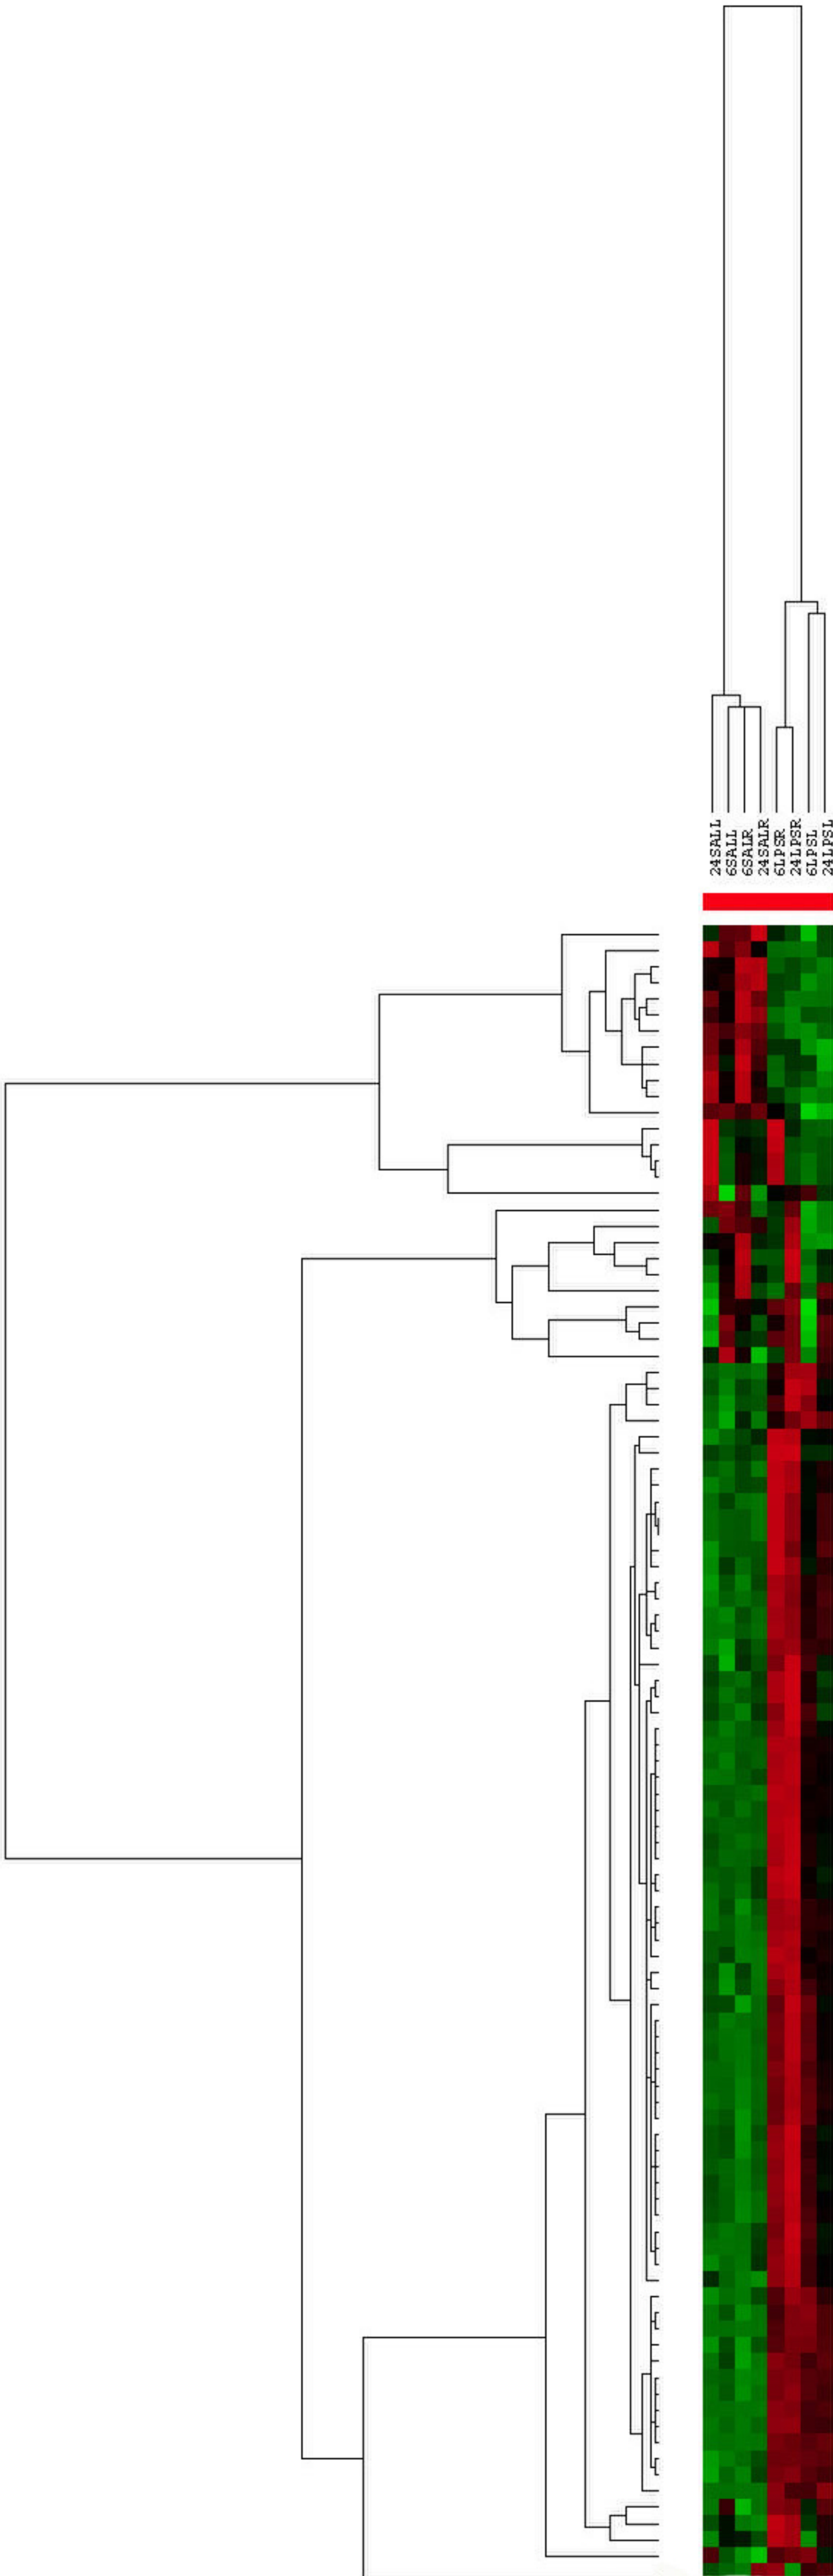

AF087839 RNSUR2S1 sulfonylurea receptor 2 SUR2 gene  
 rc\_AA799438 EST188935  
 D50564 mercaptopyruvate sulfurtransferase  
 AF090867 guanosine monophosphate reductase  
 rc\_AA875531  
 guanine nucleotide binding protein gamma subunit 11  
 AF016296 neuropilin mRNA  
 rc\_AA891802 EST195605  
 U10995 Wistar orphan receptor COUP-TFI mRNA  
 fibulin 5  
 Tropoelastin  
 Acyl CoA synthetase, long chain  
 E00775cds cDNA encoding rat cardionatrin precursor  
 X5153lods RRAML01 atrial myosin light chain 1  
 rc\_AA891242 EST195045  
 rc\_AA891242 EST195045  
 v-maf musculoaponeurotic fibrosarcoma avian oncogene homolog c-maf  
 Secreted acidic cystein-rich glycoprotein osteonectin  
 S68245 carbonic anhydrase IV  
 AF034237 DD6A4-1  
 rc\_AA892520 EST196323  
 Epithelial membrane protein 1  
 M29853 Rat cytochrome P-450 isozyme 5 P450 IVE2  
 D42116 5I2 antigen, clone 17  
 Carboxypeptidase D precursor  
 rc\_A1007824 EST202275  
 taurine/beta-alanine transporter  
 M29866 RATC3 Rat complement component C3  
 Haptoglobin  
 rc\_A1176546 EST220133  
 Cathepsin L  
 D10756 RATPRORE proteasome subunit R-ZETA  
 AA848563 EST191323  
 U13396 RNUL3396 Rattus norvegicus protein-tyrosine kinase JAK2 mRNA, complete cds  
 Tumor necrosis factor receptor  
 AF087944 monocyte differentiation antigen CD14 gene, promoter region  
 phosphatidate phosphohydrolase type 2  
 phosphatidate phosphohydrolase type 2  
 AF034577 pyruvate dehydrogenase  
 Cytochrome P450 1b1  
 RT1 class Ib gene  
 D10757 RATPRORRL2 proteasome subunit R-RING12  
 phosphatidate phosphohydrolase type 2  
 L20869 pancreatitis associated protein III PAPIII0  
 Selectin, endothelial cell  
 rc\_AA859827  
 Early growth response 1  
 Z75029 hsp70.2 heat shock protein  
 Interleukin 6 interferon, beta 2  
 S77528cds rNFIL-6=C/EBP-related transcription factor  
 U13396 RNUL3396 protein-tyrosine kinase JAK2  
 M98820 interleukin 1-beta  
 rc\_A1175959 EST219534  
 rc\_AA891041 EST194844  
 X06769cds RNCFOSR Rat c-fos mRNA  
 L18948 intracellular calcium-binding protein MRP14  
 Avian myelocytomatosis viral v-myc oncogene homolog  
 DnaJ-like protein  
 rc\_A1177503 EST221135  
 DNA-damage-inducible transcript 1  
 X63594cds RRRLIF1 R.rattus RL/IF-1 mRNA  
 Heme oxygenase  
 B-cell translocation gene 2, anti-proliferative  
 B-cell translocation gene 2, anti-proliferative  
 E01884cds rat IL-1-beta/interleukin-1 beta  
 Signal transducer and activator of transcription 3  
 v-crk-associated tyrosine kinase substrate  
 estrogen-responsive uterine transcript  
 rc\_A1169327 EST215162  
 rc\_A1169327 EST215162  
 M86389cds RATHSP27A heat shock protein Hsp27  
 Glutamine synthetase glutamate-ammonia ligase  
 rc\_A1176658 EST220250  
 M98820 interleukin 1-beta  
 Z18877 2'5' oligoadenylate synthetase  
 AF075383 suppressor of cytokine signaling-3 SOCS-3  
 X17053cds RMTJE immediate-early serum-responsive JE gene  
 L16764 RATHSP70A heat shock protein 70 HSP70  
 S74141 hck-tyrosine kinase  
 S61868 ryudocan=heparan sulfate proteoglycan core protein [rats, microvascular endothelial cells, mRNA, 2462 nt]  
 Protein-tyrosine phosphatase  
 AB000717exons#1-8 AB000716S2 non-hepatic-type S-adenosylmethionine synthetase, exon 2  
 AF047707 UDP-glucose:ceramide glycosyltransferase  
 rc\_AA859837  
 L40364 MHC class I RT1.L type -149 processed pseudogene  
 rc\_A1176456 EST220041  
 RT1 class Ib gene  
 RT1 class Ib gene  
 M11794 RATMTL2C metallothionein-2 and metallothionein-1 genes  
 rc\_A1102562 EST211851  
 rc\_AA946503 EST202002  
 rc\_AA799861 EST189358  
 S61973 NMDA receptor glutamate-binding subunit  
 M98049 RATPAPC pancreatitis-associated protein pap mRNA, complete cds  
 D10757 RATPRORRL2 proteasome subunit R-RING12  
 D00913 RATICAM intercellular adhesion molecule-1  
 X51529 platelet phospholipase  
 rc\_AA892146 EST195949  
 AF038571 glutamate transporter  
 L18889 RATCALNEXI calnexin mRNA  
 rc\_AA799498 EST188995  
 AF030358 chemokine CX3C
